# Supplementary material
Source: HighWire-hosted journal article supplement (https://bmjopen.bmj.com/content/15/2/e089031)
Supplement: inline-supplementary-material-4 [file inline-supplementary-material-4.pdf]

**Table S1**  
Side effects experienced with the use of Pentrox®

|                  | Incidence across studies N (%) |                         |                  |                  |                   |                        |                   |               |                 |                   |
|------------------|--------------------------------|-------------------------|------------------|------------------|-------------------|------------------------|-------------------|---------------|-----------------|-------------------|
| Side effect      | Moss<br>(n=30)                 | Nguyen<br>13<br>(n=115) | Spruyt<br>(n=49) | Hayne<br>(n=192) | Twidale<br>(n=45) | Nguyen<br>15<br>(n=85) | Grummet<br>(n=42) | Lee<br>(n=64) | Huang<br>(n=30) | Stewart<br>(n=77) |
| Mild wheeze      | 1 (3%)                         |                         |                  |                  |                   |                        |                   |               |                 |                   |
| Cough            | 1 (3%)                         |                         |                  |                  | 8 (18%)           |                        |                   |               | 1 (3%)          |                   |
| Vomiting         | 3(10%)                         |                         |                  |                  |                   |                        |                   |               |                 |                   |
| Nausea           | 1 (3%)                         |                         | 1 (2%)           | 5 (3%)           | 4 (9%)            |                        |                   |               |                 |                   |
| Dizziness        |                                |                         | 2 (4%)           | 100 (52%)        | 21 (47%)          |                        | NR <sup>i</sup>   |               |                 |                   |
| Euphoria         |                                |                         | 2 (4%)           |                  |                   |                        |                   |               |                 | NR                |
| Sweating         |                                |                         | 1 (2%)           |                  |                   |                        |                   |               |                 |                   |
| Taste alteration |                                |                         | 1 (2%)           | 4 (2%)           |                   |                        | NR                | NR            | NR              | NR                |
| Flushing         |                                |                         | 1 (2%)           |                  |                   |                        |                   |               |                 |                   |

|                             |  |        |        |          |         |        |  |  |        |    |
|-----------------------------|--|--------|--------|----------|---------|--------|--|--|--------|----|
| Hypertension                |  |        | 1 (2%) |          |         |        |  |  |        |    |
| Anxiety                     |  |        | 1 (2%) |          |         |        |  |  |        |    |
| Depression                  |  |        | 1 (2%) |          |         |        |  |  |        |    |
| Sensory neuropathy/Tingling |  |        | 1 (2%) |          |         |        |  |  |        |    |
| Drowsiness/lethargy         |  |        | 1 (2%) | 86 (45%) | 5 (11%) |        |  |  |        |    |
| Headache                    |  |        |        | 6 (3%)   |         |        |  |  |        |    |
| Low GCS                     |  |        |        |          |         |        |  |  | 1 (3%) |    |
| Restless legs               |  |        |        |          |         |        |  |  |        | NR |
| Amnesia                     |  |        |        |          |         |        |  |  |        | NR |
| Respiratory depression      |  | 0 (0%) |        |          |         | 0 (0%) |  |  |        |    |
| Hypotension                 |  | 5 (4%) |        |          |         | 1 (1%) |  |  |        |    |
| Cardiac arrhythmia          |  | 3 (3%) |        |          |         | 1 (1%) |  |  |        |    |

<sup>i</sup> NR – reported side effect but actual incidence not reported
